# Supplementary figures and images for: Live cell division dynamics monitoring in 3D large spheroid tumor models using light sheet microscopy
Source: Springer Nature journal article supplement (doi:10.1186/1747-1028-6-22), 2011-12-01

A

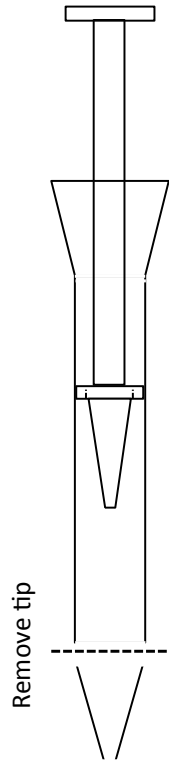

B

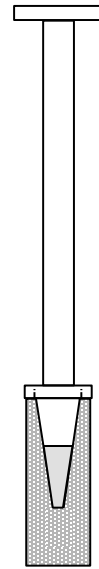

C

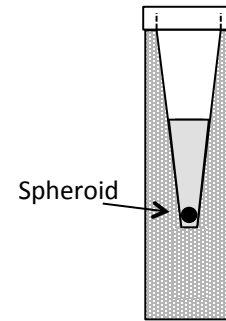

Supplement: Additional file 8 [file 1747-1028-6-22-s8.pdf]
